# Supplementary material
Source: ML conference proceedings conference paper supplement (https://openreview.net/forum?id=G560qr59Gi)

Stable Ranks for Different Weight Variances

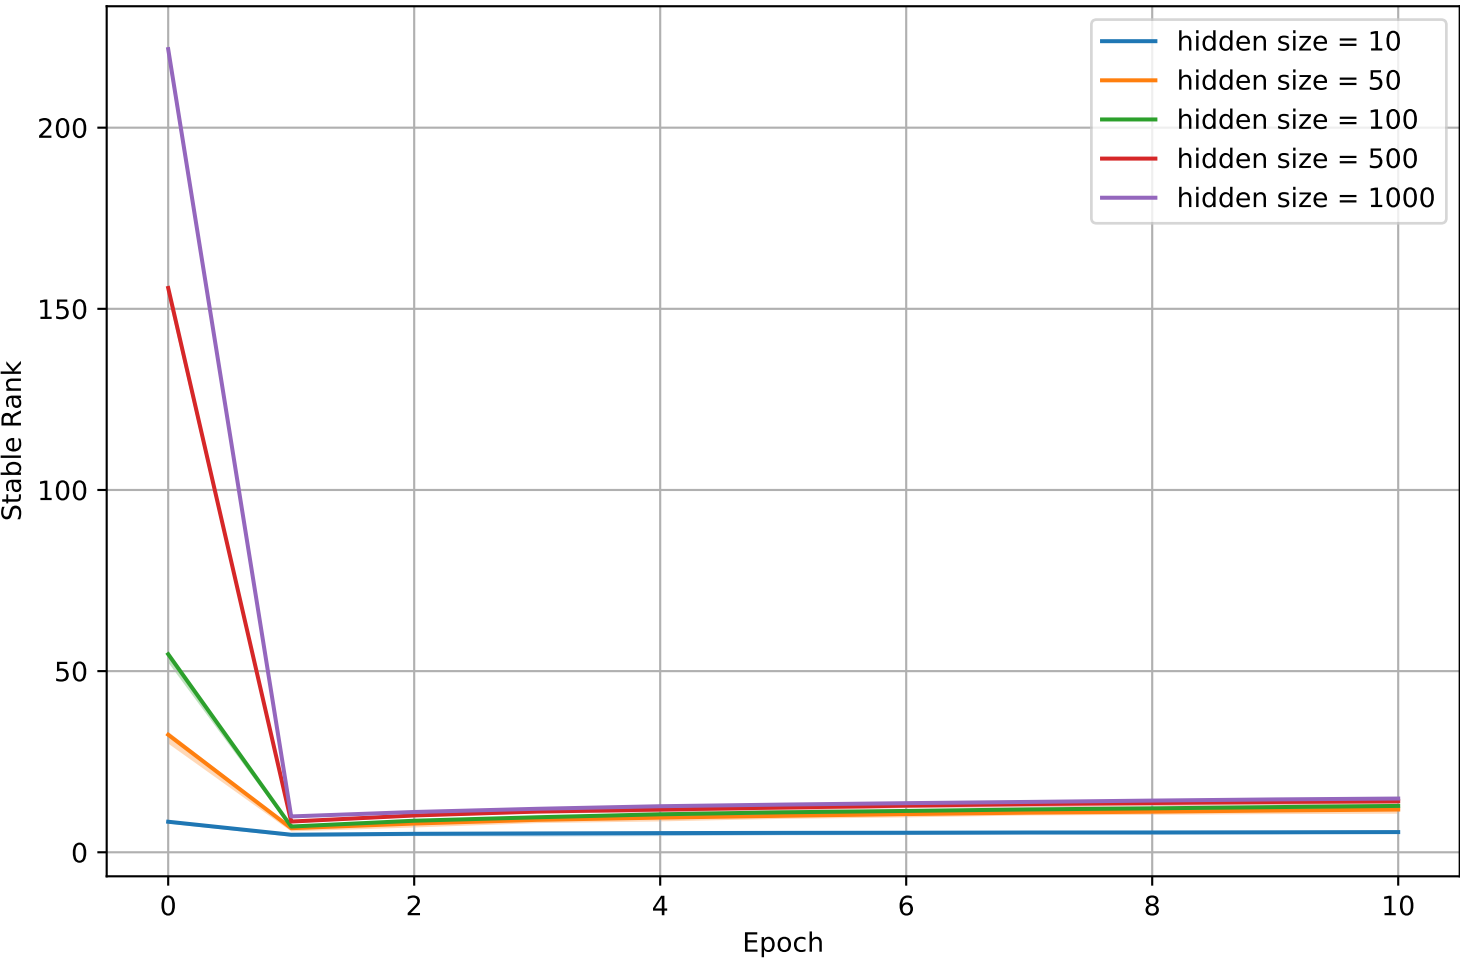

Test Accuracy for Different Weight Variances

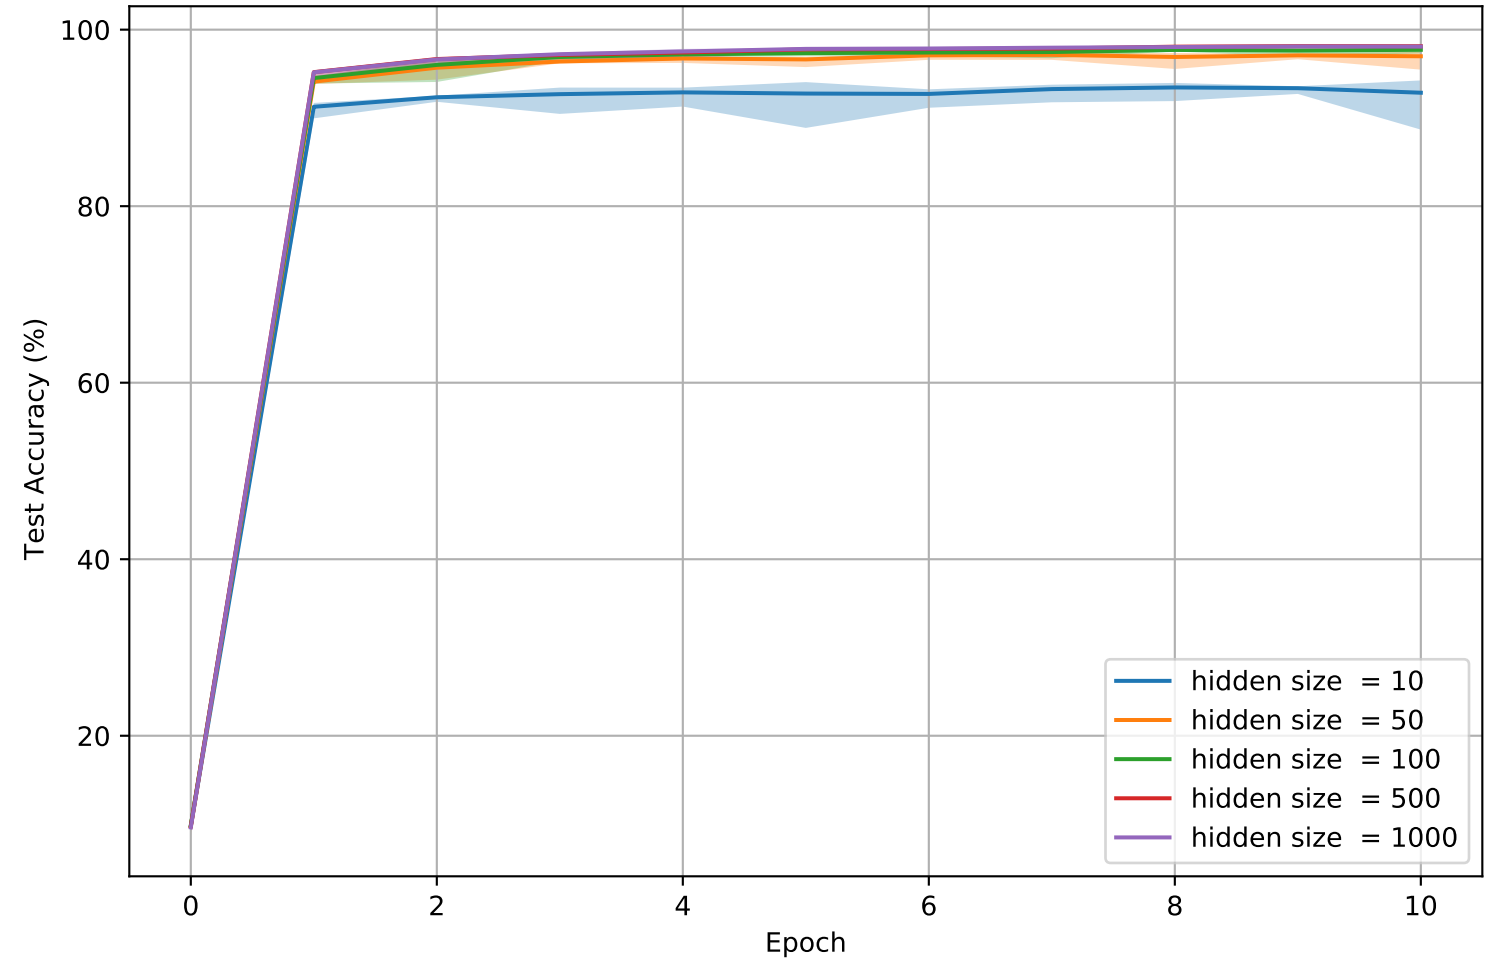

Supplement: supplementary_material [file attachment]

Stable Ranks for Different Weight Variances

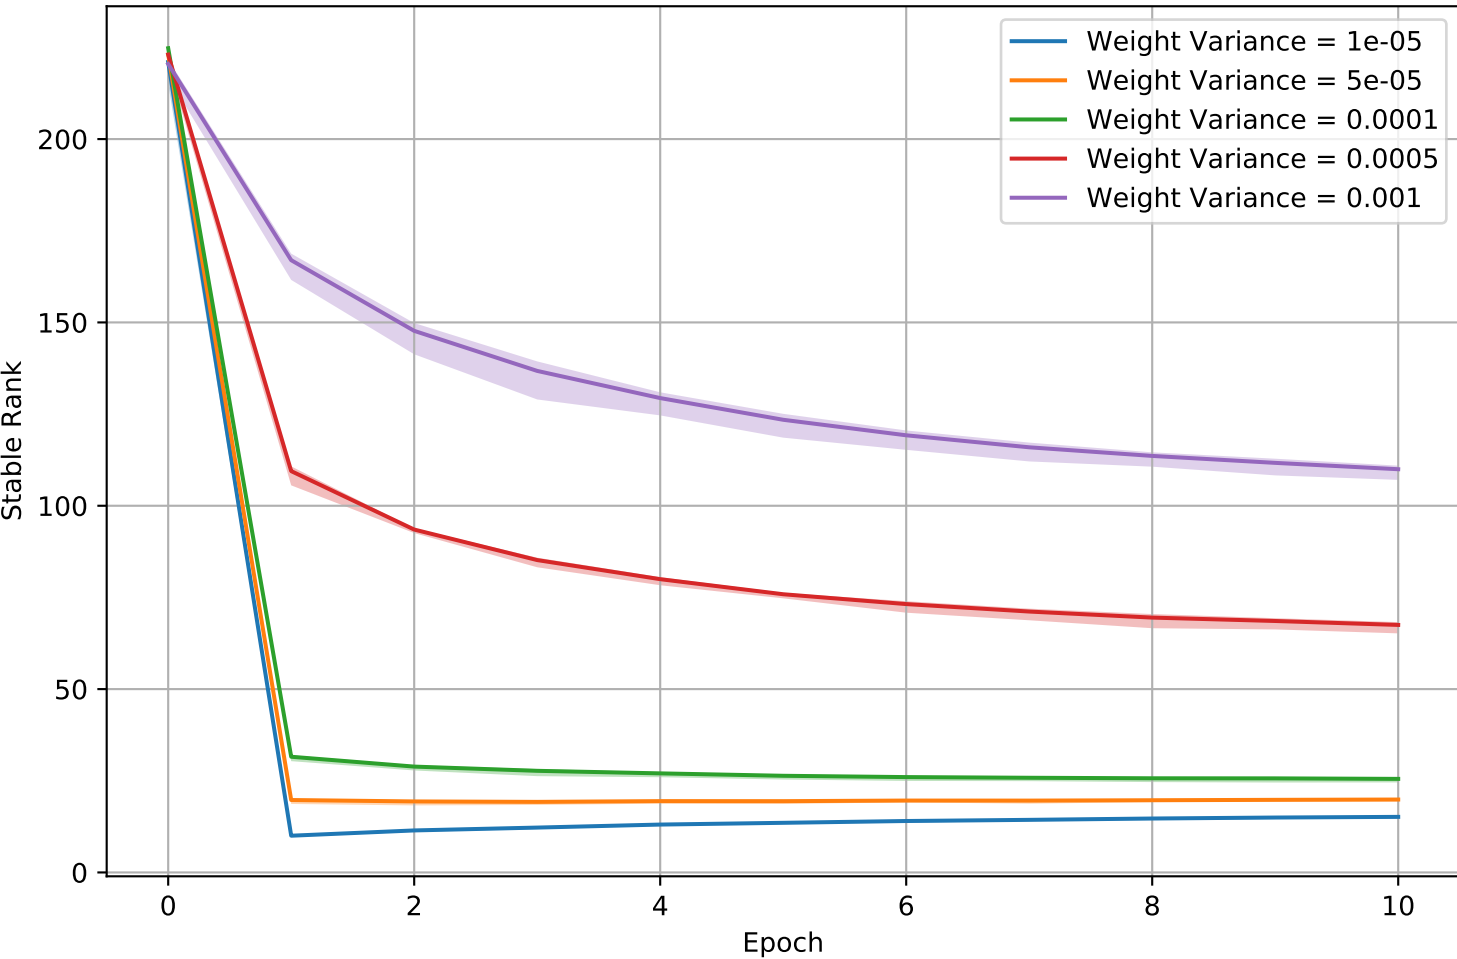

Test Accuracy for Different Weight Variances

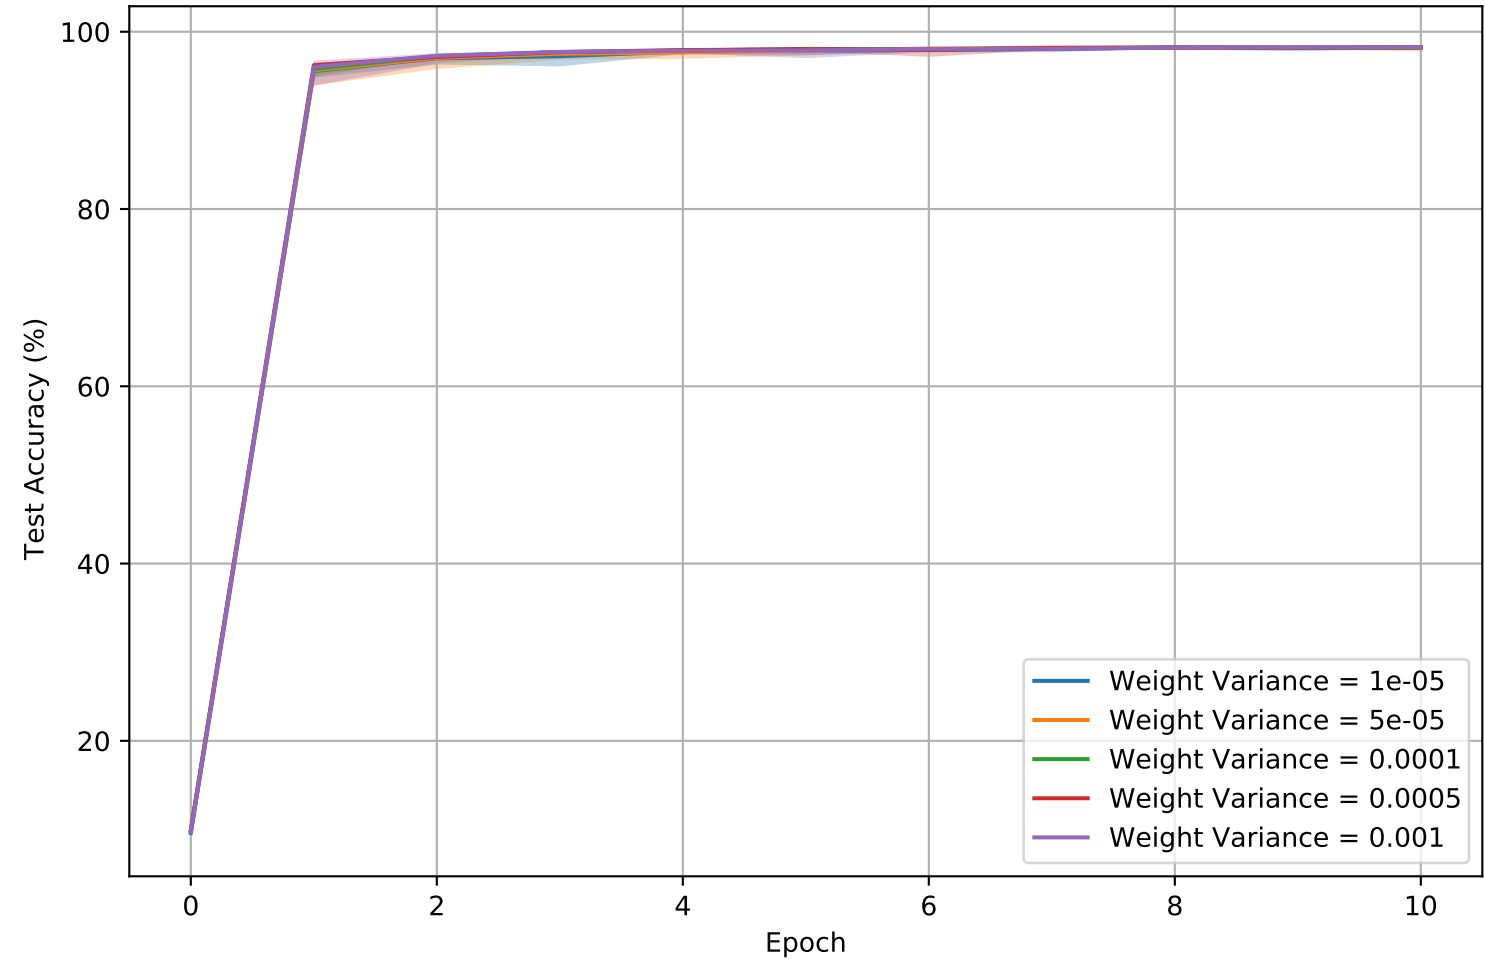

Supplement: supplementary_material [file attachment]

Stable Ranks for Different Weight Variances

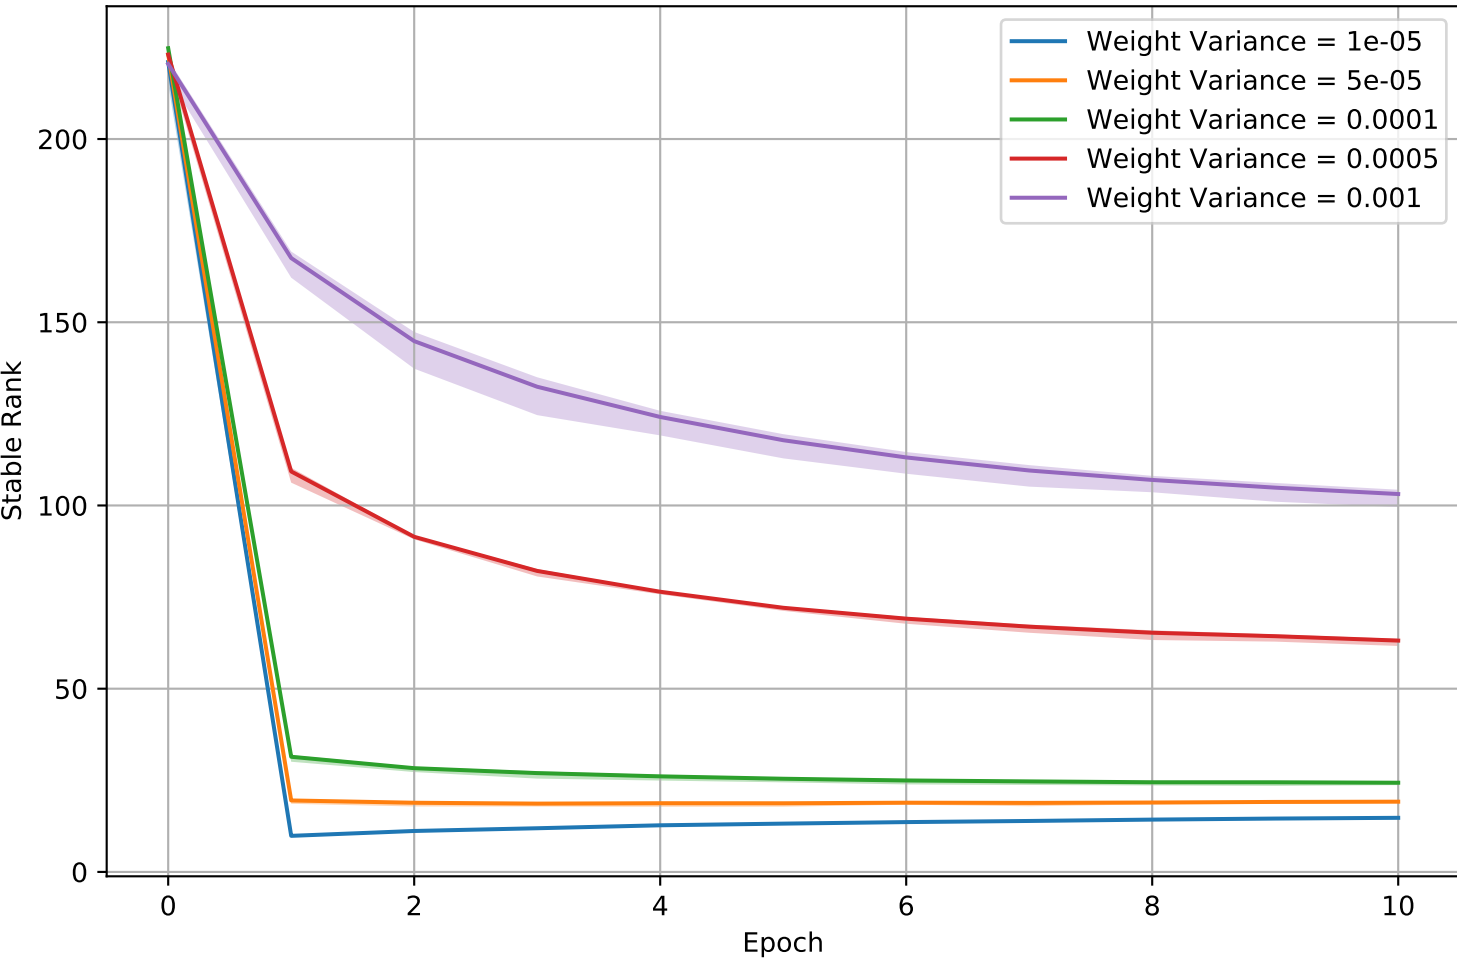

Test Accuracy for Different Weight Variances

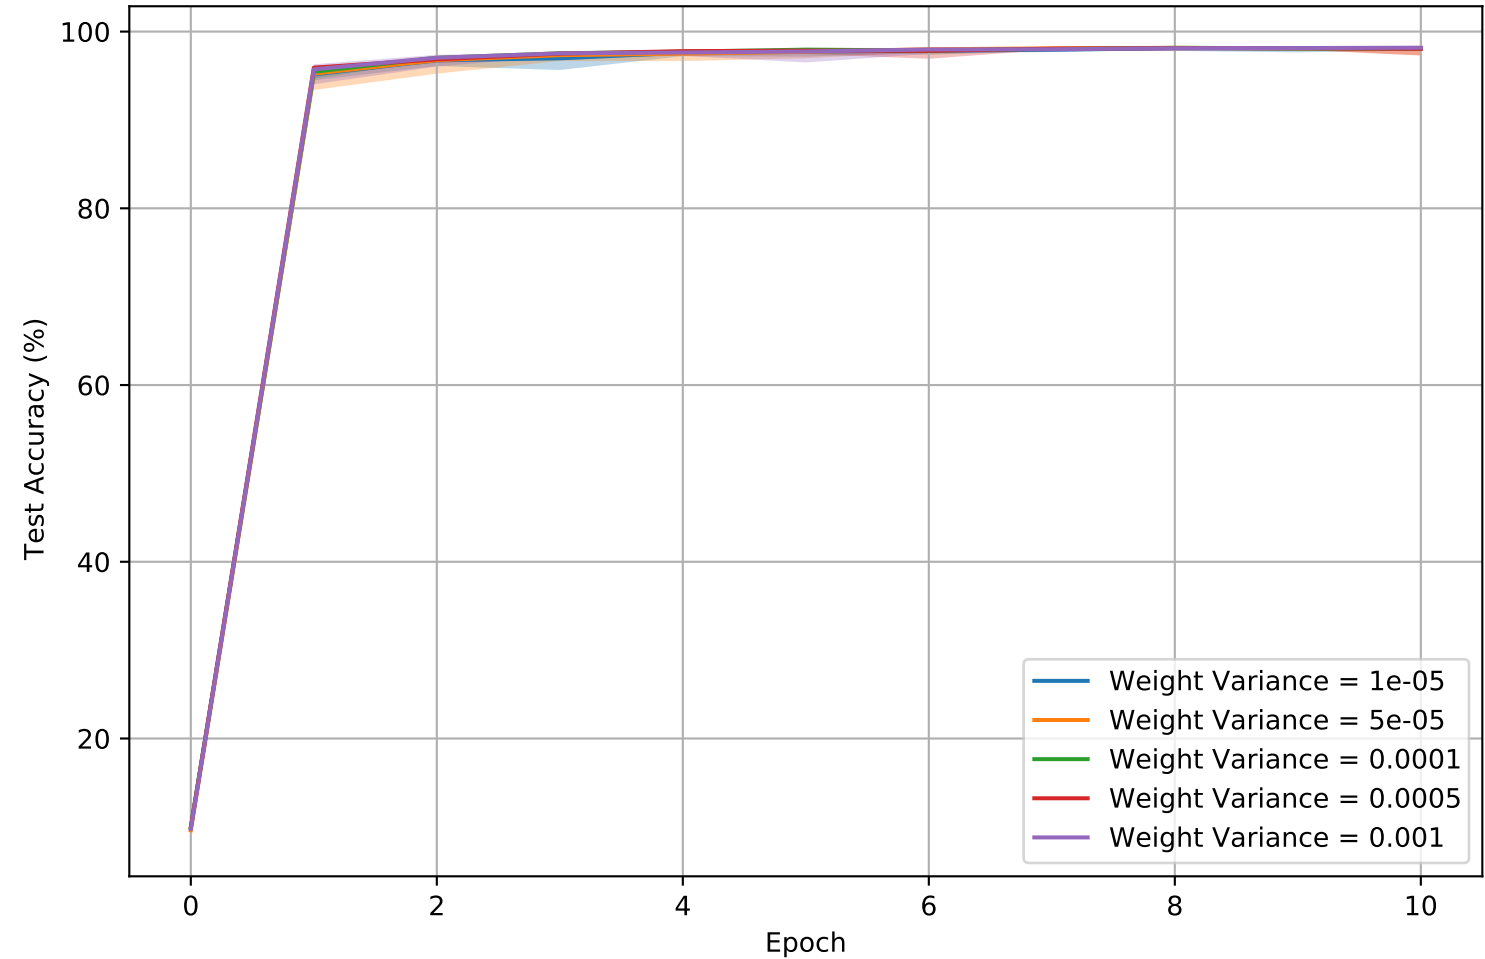

Supplement: supplementary_material [file attachment]

Stable Ranks for Different Weight Variances



Test Accuracy for Different Weight Variances



Supplement: supplementary_material [file attachment]

Stable Ranks for Different Leaky ReLU Slopes

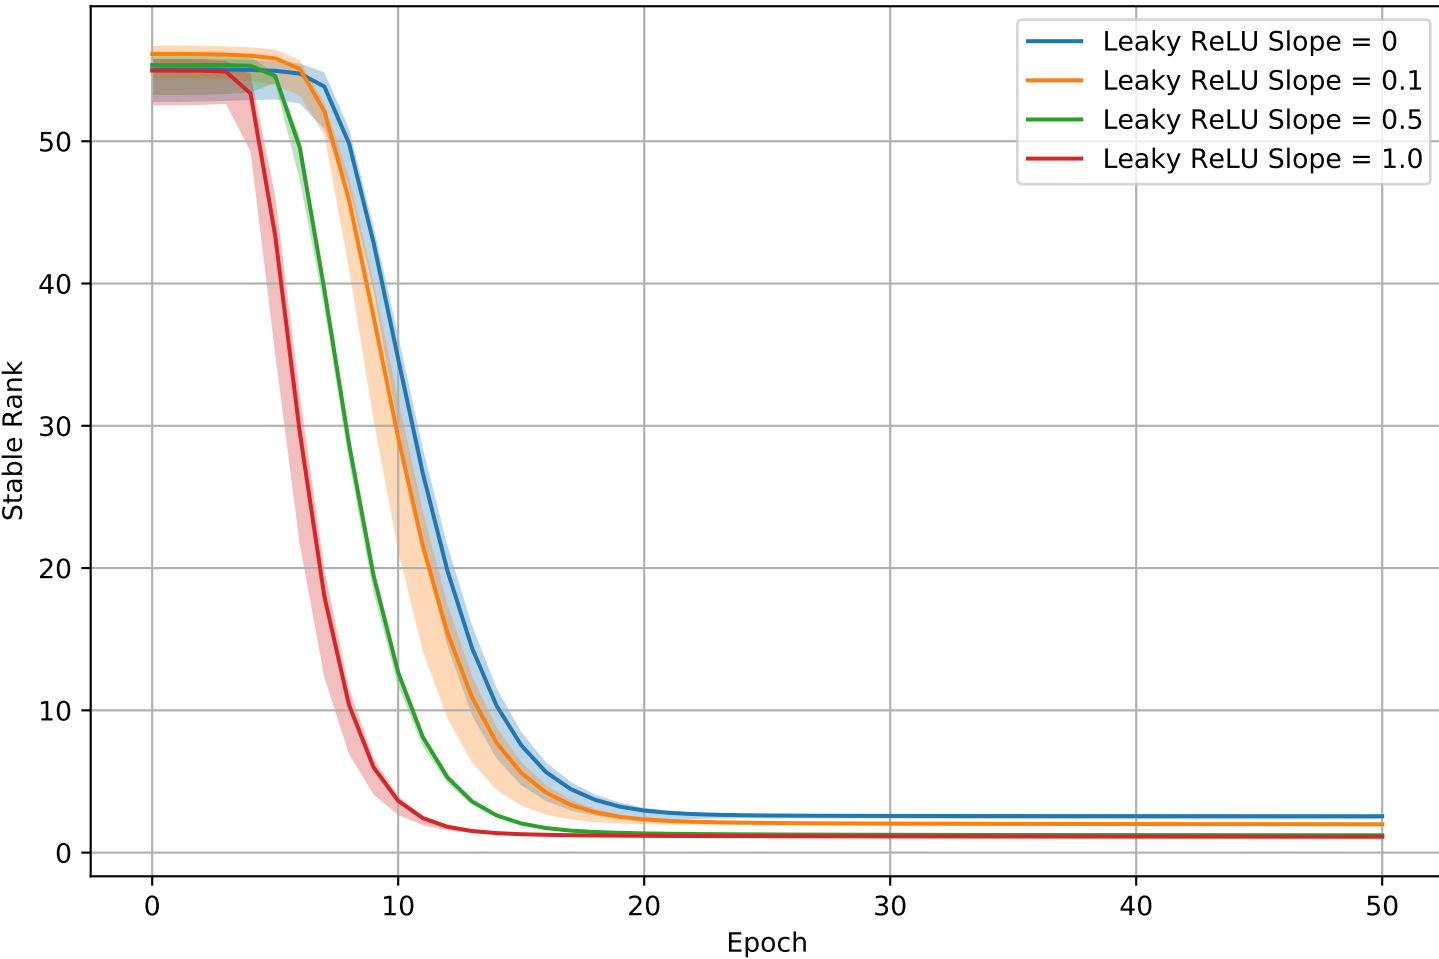

Training Loss for Different Leaky ReLU Slopes

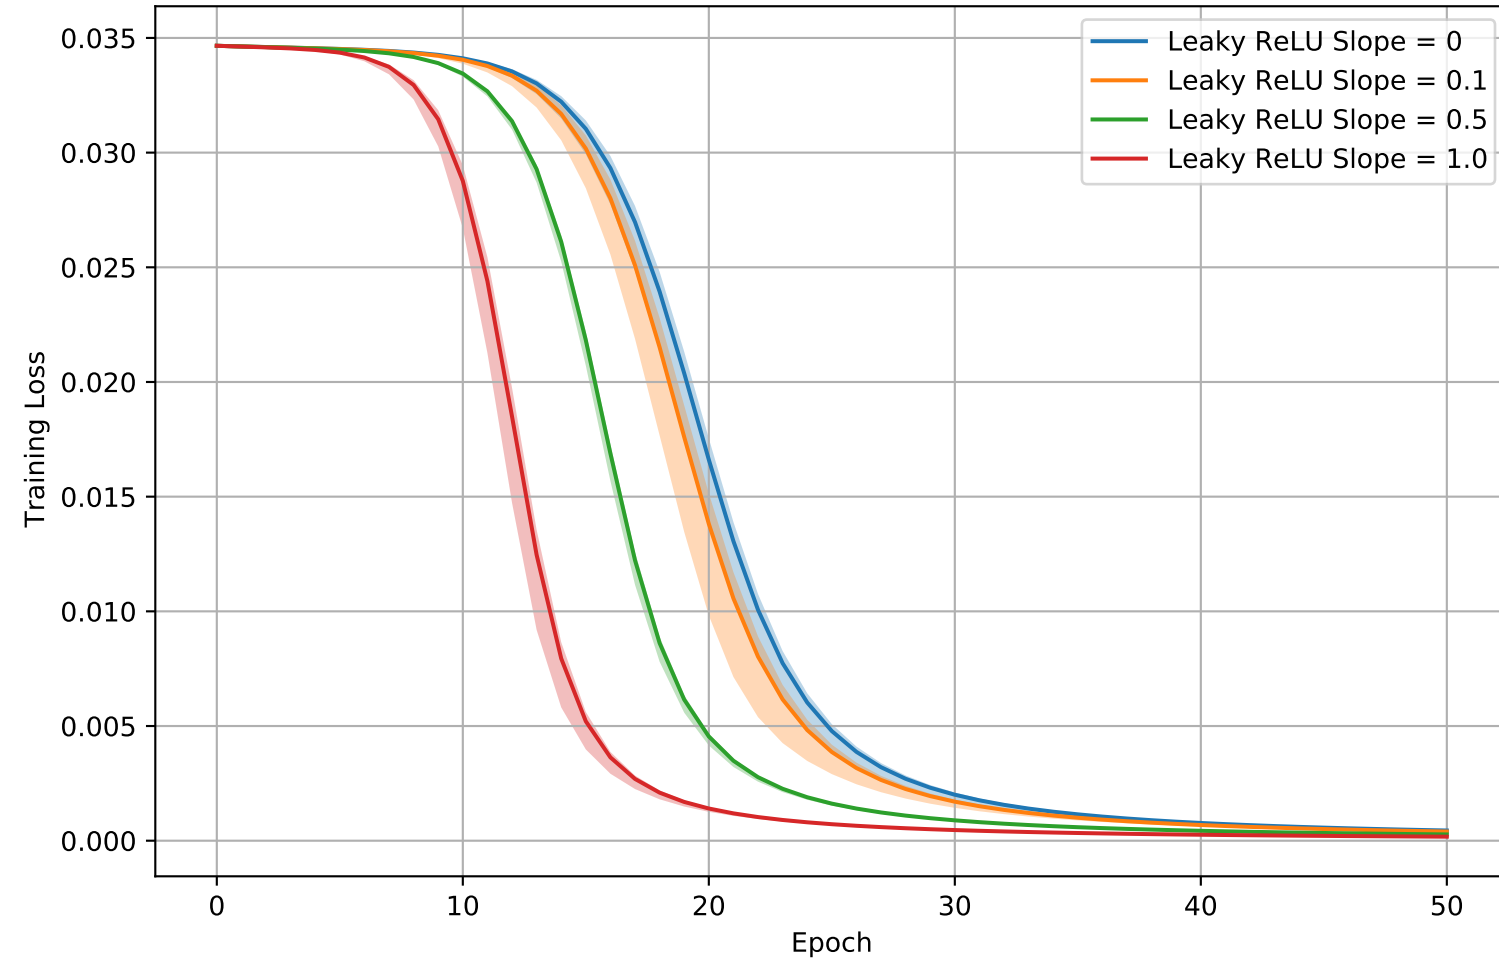

Supplement: supplementary_material [file attachment]
